# Supplementary material for: Mitochondrial genome variation in male LHON patients with the m.11778G > A mutation
Source: Springer Nature journal article supplement (doi:10.1007/s11011-020-00605-3), 2020-08-01
Supplement: MOESM1 [file 18239538]

Metabolic Brain Disease

**Mitochondrial genome variation in male LHON patients with the m.11778G>A mutation**

Agnieszka Piotrowska-Nowak <sup>1,\*</sup>, Maciej R. Krawczyński <sup>2,3</sup>, Ewa Kosior-Jarecka <sup>4</sup>, Anna M. Ambroziak <sup>5</sup>, Magdalena Korwin <sup>6</sup>, Monika Ołdak <sup>7,8</sup>, Katarzyna Tońska <sup>1</sup>, Ewa Bartnik <sup>1,9</sup>

<sup>1</sup> Institute of Genetics and Biotechnology, Faculty of Biology, University of Warsaw, 5a Pawińskiego Street, Warsaw, 02-106, Poland

<sup>2</sup> Department of Medical Genetics, Poznań University of Medical Sciences, 8 Rokietnicka Street, Poznań, 60-806, Poland

<sup>3</sup> Centers for Medical Genetics GENESIS, 4 Grudzieniec Street, Poznań, 60-601, Poland

<sup>4</sup> Department of Diagnostics and Microsurgery of Glaucoma, Medical University of Lublin, 1 Chmielna Street, Lublin, 20-079, Poland

<sup>5</sup> Faculty of Physics, University of Warsaw, 5 Pasteur Street, Warsaw, 02-093, Poland

<sup>6</sup> Department of Ophthalmology, Medical University of Warsaw, 13 Sierakowskiego Street, Warsaw, 03-709, Poland

<sup>7</sup> Department of Genetics, Institute of Physiology and Pathology of Hearing, 10 Mochnackiego Street, Warsaw, 02-042, Poland

<sup>8</sup> Department of Histology and Embryology, Center of Biostructure Research, Medical University of Warsaw, 5 Chałubińskiego Street, Warsaw, 02-004, Poland

<sup>9</sup> Institute of Biochemistry and Biophysics Polish Academy of Sciences, 5a Pawińskiego Street, Warsaw, 02-106, Poland

\*Correspondence:

Agnieszka Piotrowska-Nowak

Email: [apiotrowska@biol.uw.edu.pl](mailto:apiotrowska@biol.uw.edu.pl)

**Supplementary Table S1** mtDNA haplogroup details, total variant loads and variant loads using only non-synonymous variants with MutPred score above 0.5 threshold calculations for all participants in the study

| <b>LHON male subject ID</b> | <b>Age in years</b> | <b>mtDNA haplogroup</b> | <b>Total variant load</b> | <b>Number of variants</b> | <b>Variant load using variants with MutPred score &gt;0.5</b> | <b>Number of variants with MutPred score &gt;0.5</b> |
|-----------------------------|---------------------|-------------------------|---------------------------|---------------------------|---------------------------------------------------------------|------------------------------------------------------|
| 3595                        | 42                  | H10b                    | 1.712                     | 4                         | 0.638                                                         | 1                                                    |
| 4106                        | 33                  | H5a1a                   | 0.821                     | 2                         | 0.000                                                         | 0                                                    |
| 4806                        | 35                  | X2b+226                 | 2.349                     | 6                         | 0.569                                                         | 1                                                    |
| 5529                        | 42                  | U4a2a2                  | 1.466                     | 5                         | 0.000                                                         | 0                                                    |
| 6586                        | 33                  | U4c1                    | 1.850                     | 6                         | 0.000                                                         | 0                                                    |
| 9594                        | 35                  | N1b1a2                  | 3.005                     | 7                         | 1.210                                                         | 2                                                    |
| 9922                        | 42                  | J2a1a1a                 | 3.506                     | 9                         | 1.396                                                         | 2                                                    |
| 10911                       | 33                  | U5b1e1                  | 1.533                     | 5                         | 0.000                                                         | 0                                                    |
| 11266                       | 35                  | K1c1h                   | 2.257                     | 6                         | 0.609                                                         | 1                                                    |
| 11922                       | 42                  | U5a1a1                  | 2.625                     | 7                         | 0.561                                                         | 1                                                    |
| 13933                       | 33                  | H7a1                    | 0.821                     | 2                         | 0.000                                                         | 0                                                    |
| 14164                       | 35                  | U5a1a1                  | 2.625                     | 7                         | 0.561                                                         | 1                                                    |
| 15046                       | 42                  | K1c1                    | 2.257                     | 6                         | 0.609                                                         | 1                                                    |
| 15415                       | 33                  | H1b1a                   | 1.361                     | 3                         | 0.540                                                         | 1                                                    |
| 15591                       | 35                  | J1c2e1                  | 2.883                     | 8                         | 1.220                                                         | 2                                                    |
| 15745                       | 42                  | W5a2                    | 2.719                     | 7                         | 0.505                                                         | 1                                                    |
| 16159                       | 33                  | W6a                     | 3.915                     | 9                         | 1.701                                                         | 3                                                    |
| 16799                       | 35                  | H1                      | 0.821                     | 2                         | 0.000                                                         | 0                                                    |
| 17367                       | 42                  | J1c2e1                  | 2.883                     | 8                         | 1.220                                                         | 2                                                    |
| 17545                       | 33                  | I2e                     | 2.261                     | 6                         | 0.606                                                         | 1                                                    |
| 17791                       | 35                  | H1a                     | 0.821                     | 2                         | 0.000                                                         | 0                                                    |
| 194-L                       | 42                  | J1c2c2a                 | 3.506                     | 10                        | 1.220                                                         | 2                                                    |
| 456-L                       | 33                  | H1e                     | 1.326                     | 3                         | 0.505                                                         | 1                                                    |
| L12-2007                    | 37                  | K2a5                    | 2.548                     | 6                         | 0.609                                                         | 1                                                    |
| L12-2008                    | 23                  | T1a1b                   | 2.793                     | 7                         | 1.239                                                         | 2                                                    |
| L12-2012                    | n/a                 | H5a1                    | 1.357                     | 3                         | 0.536                                                         | 1                                                    |
| L13-2006                    | 28                  | T1a1b                   | 2.793                     | 7                         | 1.239                                                         | 2                                                    |
| L16-2008                    | 14                  | V13                     | 0.821                     | 2                         | 0.000                                                         | 0                                                    |
| L19-2018                    | 20                  | H4b1                    | 1.485                     | 3                         | 0.664                                                         | 1                                                    |
| L21-2015                    | 20                  | J1c2e1                  | 2.883                     | 8                         | 1.220                                                         | 2                                                    |
| L21-2017                    | 34                  | N1a1a1a1                | 2.197                     | 6                         | 0.606                                                         | 1                                                    |
| L2-2018                     | 28                  | U4c1                    | 1.850                     | 6                         | 0.000                                                         | 0                                                    |
| L23-2008                    | 31                  | I2e                     | 2.261                     | 6                         | 0.606                                                         | 1                                                    |
| L24-2006                    | n/a                 | T1a1b                   | 2.793                     | 7                         | 1.239                                                         | 2                                                    |
| L24-2018                    | 47                  | H1                      | 0.821                     | 2                         | 0.000                                                         | 0                                                    |
| L26-2002                    | 19                  | H2a1c                   | 0.821                     | 2                         | 0.000                                                         | 0                                                    |
| L28-2016                    | 16                  | U5b1b1a                 | 1.235                     | 4                         | 0.000                                                         | 0                                                    |
| L29-2005                    | n/a                 | H3g4                    | 0.821                     | 2                         | 0.000                                                         | 0                                                    |
| L32-2006                    | 30                  | HV6a                    | 1.004                     | 3                         | 0.000                                                         | 0                                                    |
| L32-2016                    | 15                  | K1c1h                   | 2.257                     | 6                         | 0.609                                                         | 1                                                    |
| L39-2008                    | 40                  | U8b1a2b                 | 2.557                     | 6                         | 0.688                                                         | 1                                                    |
| L41-2005                    | 38                  | U5a1d1                  | 3.060                     | 9                         | 0.000                                                         | 0                                                    |
| L4-2015                     | 23                  | K1a1b1a                 | 2.257                     | 6                         | 0.609                                                         | 1                                                    |

| <b>L5-2014</b>                 | 56                  | H3v                     | 0.452                     | 1                         | 0.000                                                         | 0                                                    |
|--------------------------------|---------------------|-------------------------|---------------------------|---------------------------|---------------------------------------------------------------|------------------------------------------------------|
| <b>L7-2018</b>                 | 42                  | B4c1b2                  | 2.541                     | 6                         | 1.142                                                         | 2                                                    |
| <b>L8-2019</b>                 | 33                  | H1c                     | 0.821                     | 2                         | 0.000                                                         | 0                                                    |
| <b>L9-2010</b>                 | 35                  | H7c1                    | 0.821                     | 2                         | 0.000                                                         | 0                                                    |
| <b>Control male subject ID</b> | <b>Age in years</b> | <b>mtDNA haplogroup</b> | <b>Total variant load</b> | <b>Number of variants</b> | <b>Variant load using variants with MutPred score &gt;0.5</b> | <b>Number of variants with MutPred score &gt;0.5</b> |
| <b>KJ2</b>                     | 84                  | H92                     | 0.821                     | 2                         | 0.000                                                         | 0                                                    |
| <b>KJ6</b>                     | 71                  | H1c+152                 | 0.821                     | 2                         | 0.000                                                         | 0                                                    |
| <b>KJ7</b>                     | 70                  | H1c+152                 | 0.821                     | 2                         | 0.000                                                         | 0                                                    |
| <b>KJ8</b>                     | 64                  | H18                     | 1.230                     | 3                         | 0.000                                                         | 0                                                    |
| <b>KJ12</b>                    | 60                  | U5a1d2a1                | 2.665                     | 7                         | 0.601                                                         | 1                                                    |
| <b>KJ13</b>                    | 52                  | H                       | 0.821                     | 2                         | 0.000                                                         | 0                                                    |
| <b>KJ14</b>                    | 72                  | H3+152                  | 0.821                     | 2                         | 0.000                                                         | 0                                                    |
| <b>KJ15</b>                    | 71                  | J1c2c1                  | 3.253                     | 9                         | 1.220                                                         | 2                                                    |
| <b>KJ21</b>                    | 76                  | T2a1                    | 2.588                     | 7                         | 1.239                                                         | 2                                                    |
| <b>KJ22</b>                    | 82                  | H2a1c                   | 0.821                     | 2                         | 0.000                                                         | 0                                                    |
| <b>KJ23</b>                    | 69                  | U5a2a1                  | 2.019                     | 6                         | 0.000                                                         | 0                                                    |
| <b>KJ26</b>                    | 63                  | H+16311                 | 0.821                     | 2                         | 0.000                                                         | 0                                                    |
| <b>KJ31</b>                    | 77                  | X2b4                    | 2.349                     | 6                         | 0.569                                                         | 1                                                    |
| <b>KJ38</b>                    | 64                  | W1                      | 2.719                     | 7                         | 0.505                                                         | 1                                                    |
| <b>KJ40</b>                    | 81                  | J1c9                    | 2.883                     | 8                         | 1.220                                                         | 2                                                    |
| <b>KJ45</b>                    | 83                  | H16d                    | 0.821                     | 2                         | 0.000                                                         | 0                                                    |
| <b>KJ47</b>                    | 85                  | H5r                     | 0.821                     | 2                         | 0.000                                                         | 0                                                    |
| <b>KJ49</b>                    | 77                  | J1c5                    | 2.883                     | 8                         | 1.220                                                         | 2                                                    |
| <b>KJ52</b>                    | 60                  | H3                      | 0.821                     | 2                         | 0.000                                                         | 0                                                    |
| <b>KJ55</b>                    | 77                  | H11a1                   | 1.072                     | 3                         | 0.000                                                         | 0                                                    |
| <b>KJ56</b>                    | 61                  | V1a1                    | 2.629                     | 6                         | 0.594                                                         | 1                                                    |
| <b>KJ61</b>                    | 78                  | V7a                     | 0.821                     | 2                         | 0.000                                                         | 0                                                    |
| <b>KJ63</b>                    | 87                  | X2e2b                   | 1.716                     | 5                         | 0.000                                                         | 0                                                    |
| <b>KJ66</b>                    | 83                  | J1c2                    | 3.509                     | 9                         | 1.846                                                         | 3                                                    |
| <b>KJ67</b>                    | 62                  | H5e1a1                  | 0.821                     | 2                         | 0.000                                                         | 0                                                    |
| <b>KJ68</b>                    | 68                  | V1a                     | 1.885                     | 4                         | 0.594                                                         | 1                                                    |
| <b>KJ70</b>                    | 84                  | HV9                     | 0.821                     | 2                         | 0.000                                                         | 0                                                    |
| <b>KJ75</b>                    | 69                  | U5a2a1                  | 2.019                     | 6                         | 0.000                                                         | 0                                                    |
| <b>KJ76</b>                    | 72                  | I1a1a                   | 2.714                     | 7                         | 1.188                                                         | 2                                                    |
| <b>KJ79</b>                    | n/a                 | U4a2b                   | 1.215                     | 4                         | 0.000                                                         | 0                                                    |
| <b>KJ104</b>                   | 60                  | H16                     | 0.821                     | 2                         | 0.000                                                         | 0                                                    |
| <b>KJ106</b>                   | 56                  | N1b1a1                  | 3.070                     | 7                         | 1.275                                                         | 2                                                    |
| <b>KJ112</b>                   | 65                  | J1c2                    | 3.509                     | 9                         | 1.846                                                         | 3                                                    |
| <b>KJ116</b>                   | 83                  | H1c1                    | 0.821                     | 2                         | 0.000                                                         | 0                                                    |
| <b>KJ117</b>                   | 76                  | H11b1                   | 1.581                     | 4                         | 0.509                                                         | 1                                                    |
| <b>KJ118</b>                   | 69                  | V7a                     | 0.821                     | 2                         | 0.000                                                         | 0                                                    |
| <b>KJ120</b>                   | 79                  | H7c3                    | 0.821                     | 2                         | 0.000                                                         | 0                                                    |
| <b>KJ121</b>                   | 61                  | J1c5                    | 2.883                     | 8                         | 1.220                                                         | 2                                                    |
| <b>KJ123</b>                   | 57                  | H28a                    | 1.320                     | 3                         | 0.000                                                         | 0                                                    |
| <b>KJ129</b>                   | 65                  | V1a1                    | 2.629                     | 6                         | 0.594                                                         | 1                                                    |
| <b>KJ131</b>                   | 66                  | J2a1a1a2                | 3.059                     | 8                         | 1.396                                                         | 2                                                    |
| <b>KJ153</b>                   | n/a                 | U8a1a1b                 | 2.630                     | 6                         | 1.331                                                         | 2                                                    |
